# Supplementary material for: The Mouse INO80 Chromatin-Remodeling Complex Is an Essential Meiotic Factor for Spermatogenesis
Source: PubMed Central journal article supplement — Biol Reprod. 2015 Nov 25;94(1):8. doi: 10.1095/biolreprod.115.135533 (PMC4809561; doi:10.1095/biolreprod.115.135533), 2015-11-25

**Serber et al., Supplemental Figure S1.** *Ino80* ablation using conditional deletion strategy.

**A)** Diagram of *Ino80* conditional allele and strategy for deletion following CRE exposure.

**B)** Long-range PCR confirming proper 5' targeting of cassette for the *Ino80* conditional allele in two founder male animals.

A

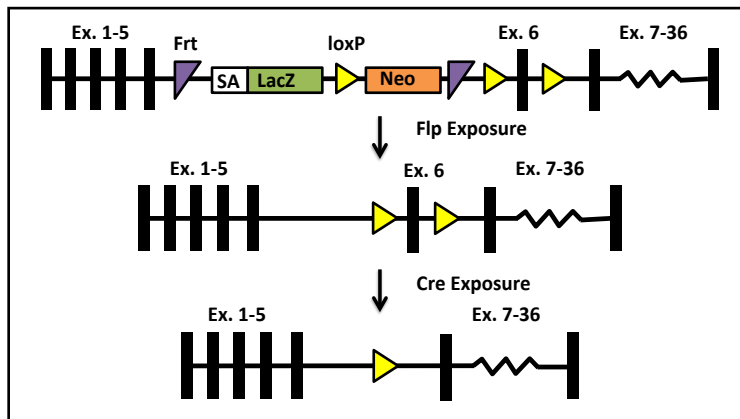

B

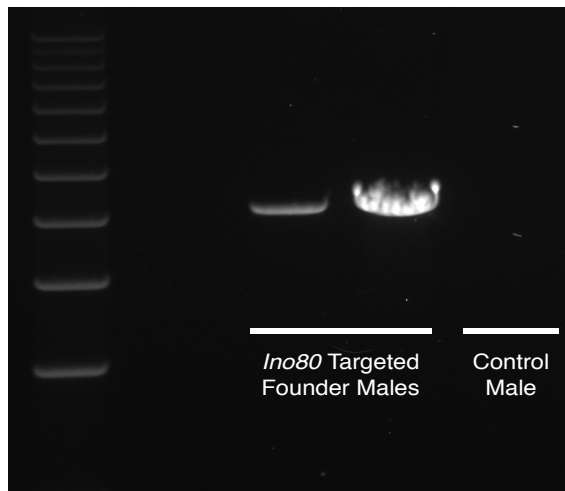

Supplement: supp_115.135533_biolreprod.115.135533-1.pdf [file supp_115.135533_biolreprod.115.135533-1.pdf]
